# Supplementary figures and images for: Genomic surveillance of coxsackievirus A10 reveals genetic features and recent appearance of genogroup D in Shanghai, China, 2016–2020
Source: PubMed Central journal article supplement — Virol Sin. 2022 Jan 24;37(2):177–86. doi: 10.1016/j.virs.2022.01.028 (PMC9170976; doi:10.1016/j.virs.2022.01.028), 2022-01-24

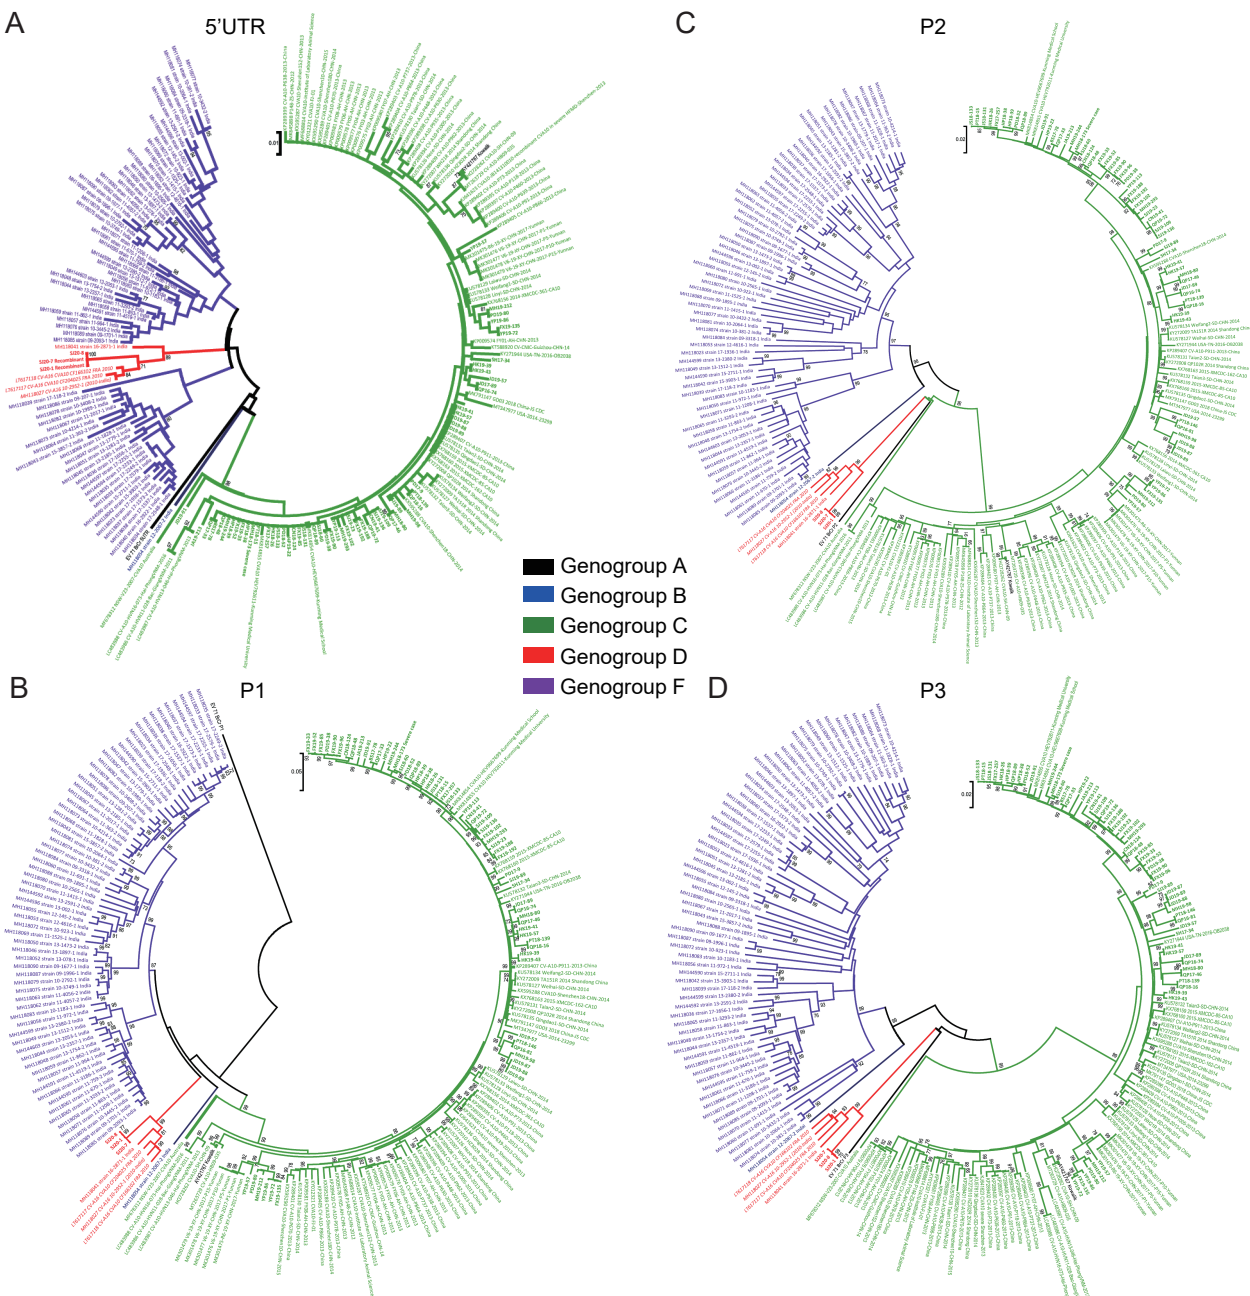

Supplement: mmc2.pdf [file mmc2.pdf]

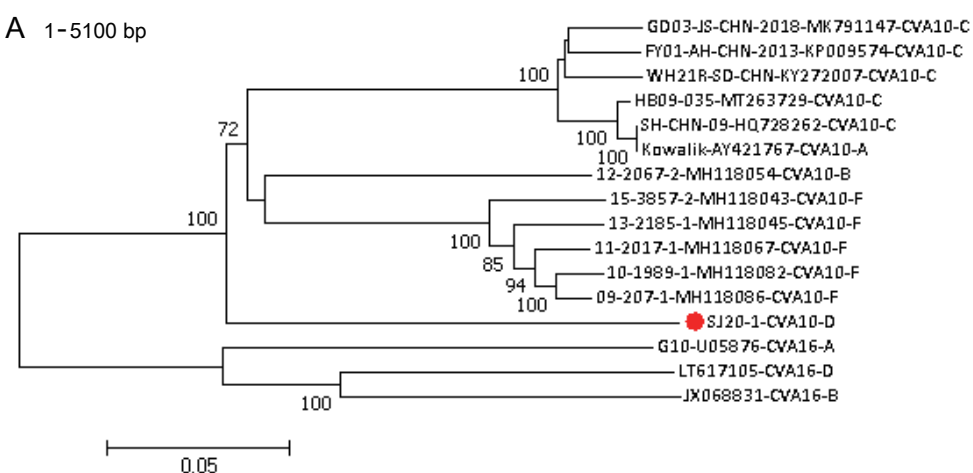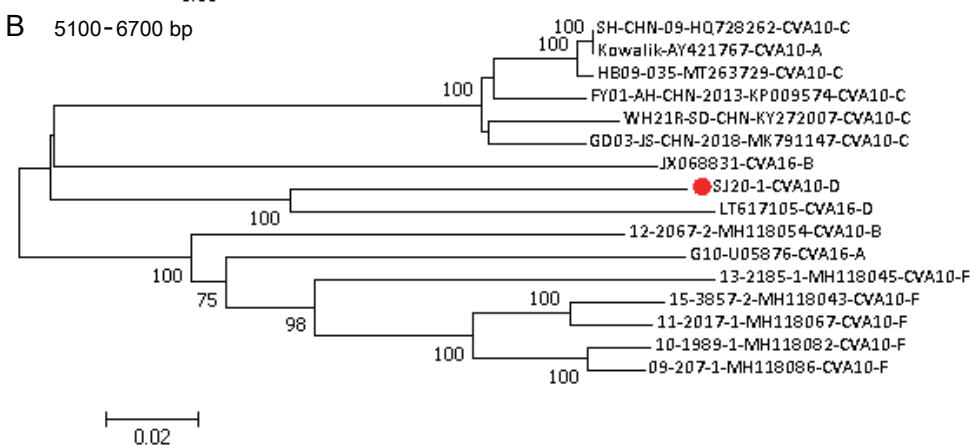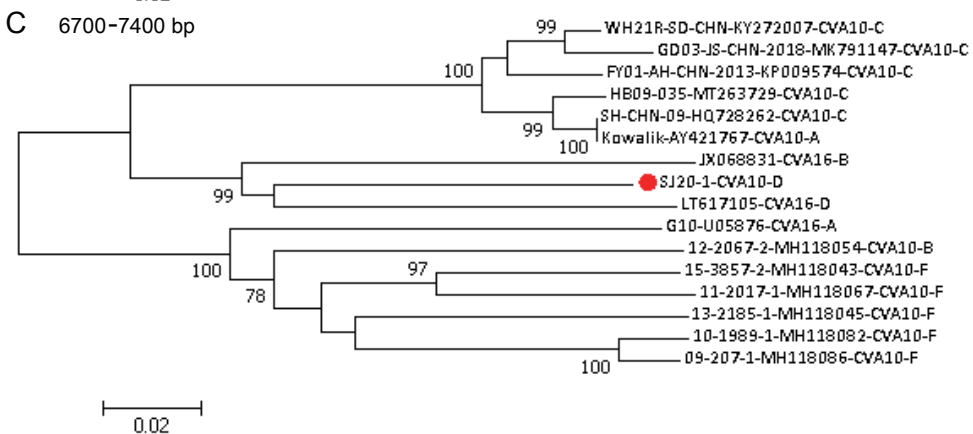

Supplement: mmc4.pdf [file mmc4.pdf]
